# Supplementary material for: The prion protein is embedded in a molecular environment that modulates transforming growth factor β and integrin signaling
Source: PubMed Central journal article supplement (PMC5988664; doi:10.1038/s41598-018-26685-x), 2018-06-05

February 7, 2018

**Supplementary Information to:**

**The prion protein is embedded in a molecular environment that modulates transforming growth factor  $\beta$  and integrin signaling**

Farinaz Ghodrati<sup>1,2, ¶</sup>, Mohadeseh Mehrabian<sup>1,2, ¶</sup>, Declan Williams<sup>1, ¶</sup>, Ondrej Halgas<sup>3</sup>, Matthew E. C. Bourkas<sup>1,3</sup>, Joel C. Watts<sup>1,3</sup>, Emil F. Pai<sup>3,4</sup>, Gerold Schmitt-Ulms<sup>1,2\*</sup>

<sup>1</sup>Tanz Centre for Research in Neurodegenerative Diseases, University of Toronto, Krembil Discovery Centre, 6<sup>th</sup> Floor, 60 Leonard Avenue, Toronto, Ontario M5T 0S8, Canada.

<sup>2</sup>Department of Laboratory Medicine & Pathobiology, University of Toronto, Medical Sciences Building, 6<sup>th</sup> Floor, 1 King's College Circle, Toronto, Ontario M5S 1A8, Canada.

<sup>3</sup>Department of Biochemistry, University of Toronto, Medical Sciences Building, 5<sup>th</sup> Floor, 1 King's College Circle, Toronto, Ontario M5S 1A8, Canada.

<sup>4</sup>Department of Medical Biophysics, University of Toronto, Princess Margaret Cancer Research Tower, 101 College Street, Toronto, Ontario M5G 1L7, Canada

¶These authors contributed equally to this work.

\*Please address correspondence to: [g.schmittulms@utoronto.ca](mailto:g.schmittulms@utoronto.ca).

**Supplementary Figure S1. Consistent and selective enrichment of PrP contrasted to non-specific binding of Gapdh.**

(a) Box plots of PrP-derived peptides in all four models. Please see legend to Fig. 2b for a detailed description of graph elements. (b) Box plots of Gapdh-derived peptides in all four models.

**Supplementary Figure S2. Selective PrP co-enrichment of Cd109 and Tmem206.**

Box plots of CD109 and Tmem206 in the subset of datasets, in which these proteins were robustly identified and quantified. Please see legend to Fig. 2b for a detailed description of graph elements.

**Supplementary Figure S3. Evidence that Ece1 is not expressed in CAD5 cells at levels detectable by western blot analysis.**

Ece1 western blot analysis of formaldehyde crosslinked lysate and eluate fractions from the PrP-directed co-immunoprecipitation of wild-type and PrP knockout CAD5 cells (analogous to data shown in Fig. 4a). The results validate the PrP interactome data (Table 1) which failed to detect Ece1 in PrP-directed co-immunoprecipitations from CAD5 cell lysates. NMuMG cell lysates were loaded as a positive control for Ece1 detection, and a Coomassie-stain of the western blot documents total protein levels in the respective lysates and eluates. Arrowheads indicate signals derived from monomeric and SDS-stable crosslinked dimeric Ece1.

**Supplementary Figure S4. PrP co-immunoprecipitates Tfrc from wild-type but not PrP knockout NMuMG cell lysates.**

Validation of the transferrin receptor protein 1 (Tfrc) as a PrP binder. Consistent with the PrP interactome data, Tfrc is only prominently represented in PrP co-immunoprecipitation eluate

fractions derived from formaldehyde-crosslinked wild-type NMuMG cells. However, whereas TfrC escaped detection by mass spectrometry in PrP co-immunoprecipitation eluates derived from wild-type C2C12 and N2a cells (Table 1), weak TfrC signals can be detected in the respective eluates by western blot analysis, presumably reflecting a slightly higher sensitivity of western blot analysis over mass spectrometry-based detection for this protein. No TfrC was observed in PrP co-immunoprecipitation eluates from CAD5 wild-type cells. Coomassie stains of the western blot membranes are shown underneath the immunoblot panels to document protein amounts in the respective samples. Blue and green arrowheads point toward TfrC monomer and formaldehyde-crosslinked dimer signals, respectively. A higher molecular mass band (possibly a crosslink of two TfrC dimers) can also be detected. The empty arrowhead shown in the Coomassie images indicates the D18 recombinant Fab used for PrP-directed immunoprecipitation. Note also the subtle differences in TfrC immunoblot signal intensities when comparing wt and PrP knockout lysates in NMuMG, C2C12 and N2a cell models, which could be indicative of molecular crosstalk between PrP and TfrC modulating steady-state levels of TfrC.

**Supplementary Table S1. Comparison of the PrP interactome in four mouse cell models.**

**Supplementary Table S2. Global proteome analysis of NMuMG cells +/- TGFB1 (dataset I) in PrP-deficient and wildtype cells (dataset II).**

# Supplementary Figure S1

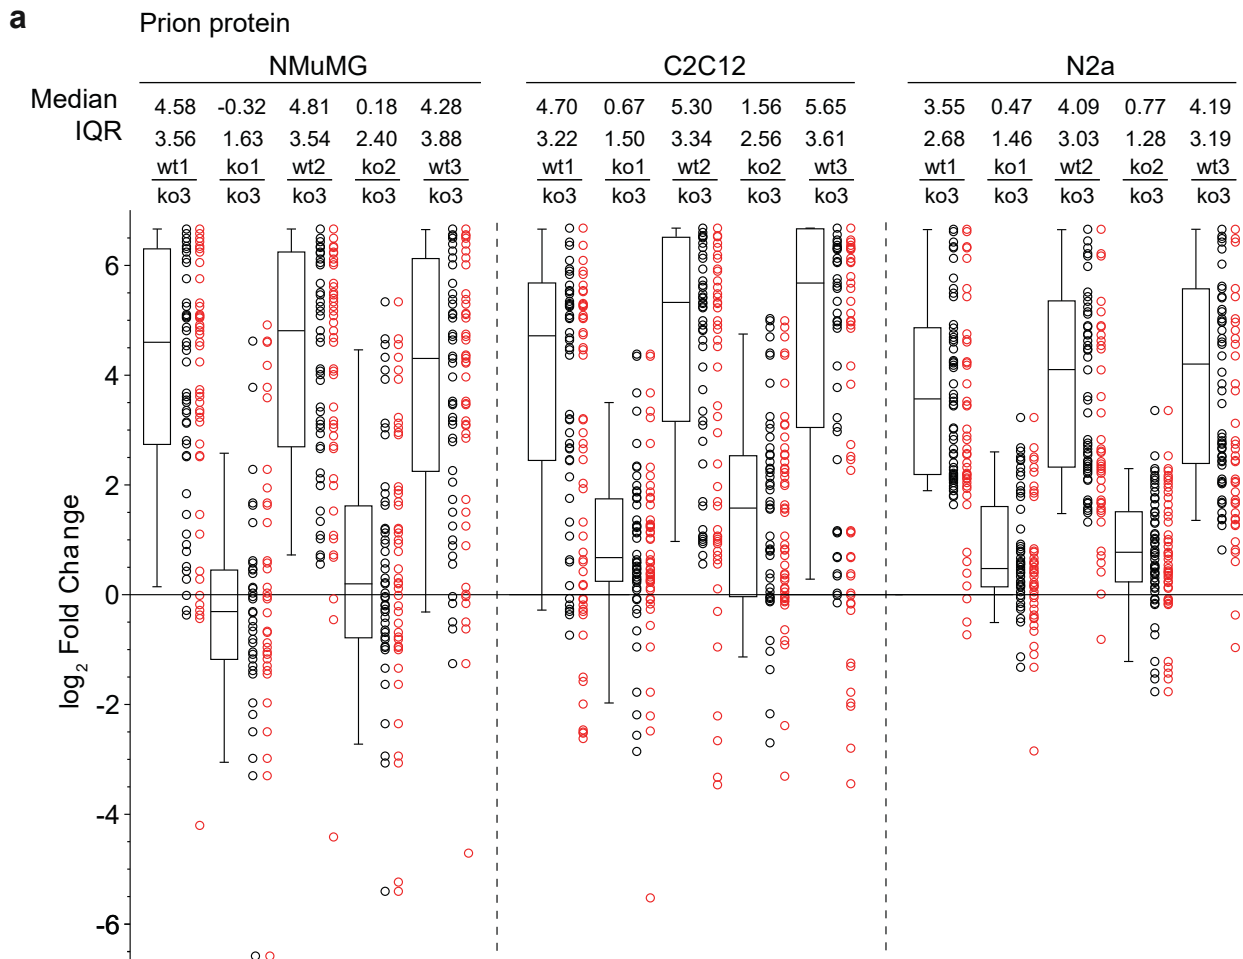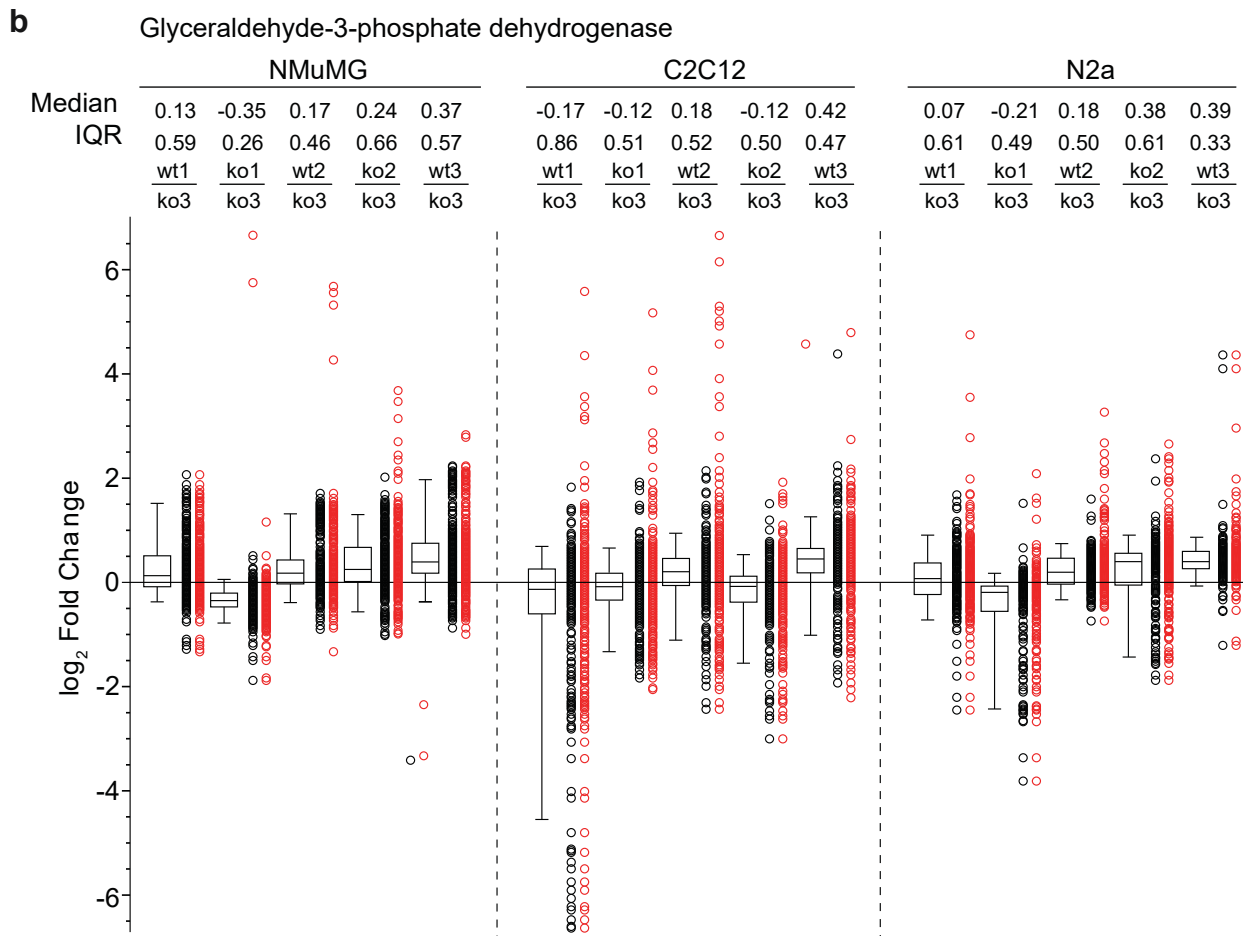

# Supplementary Figure S2

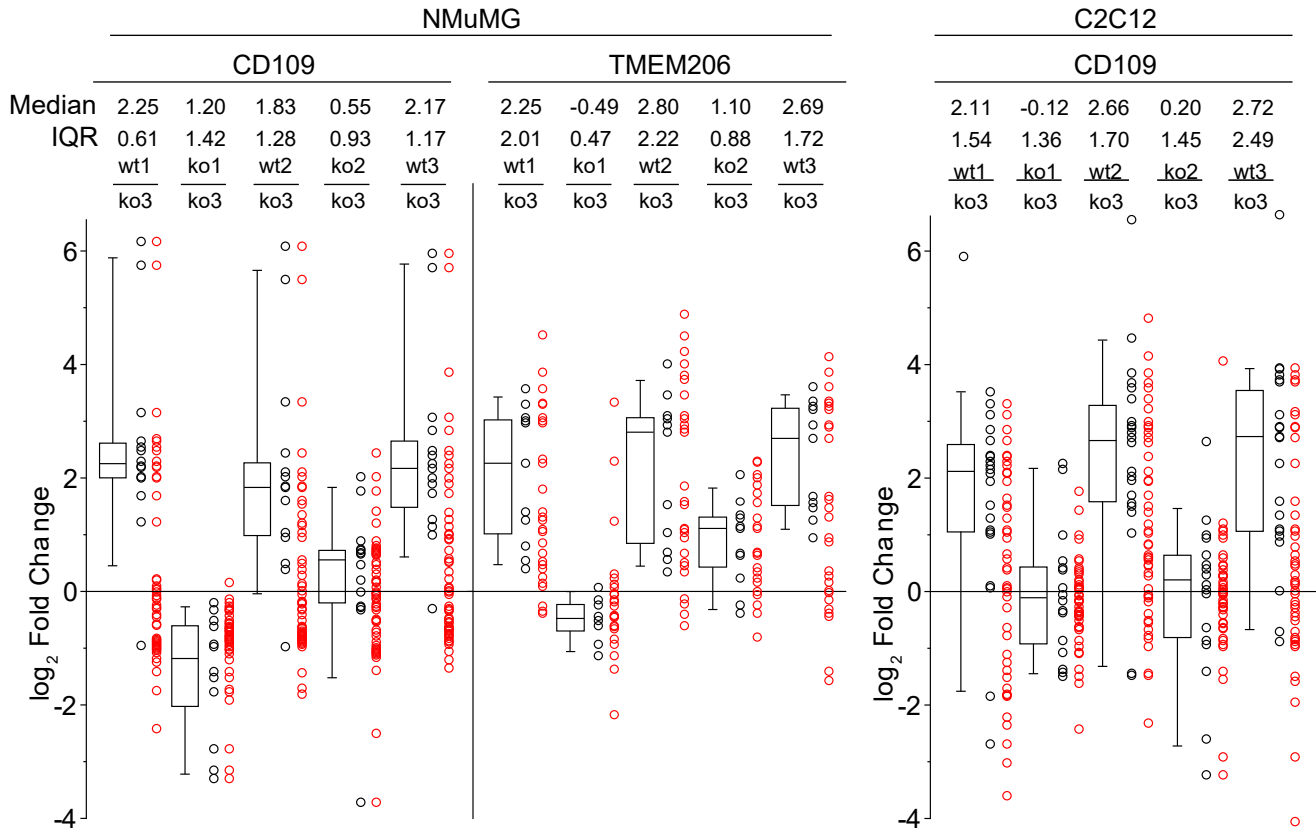

### Supplementary Figure S3

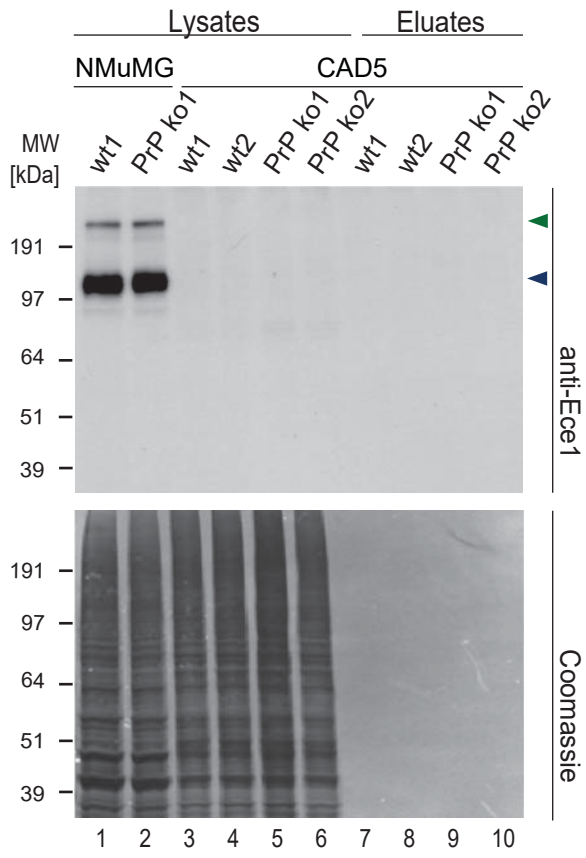

# Supplementary Figure S4

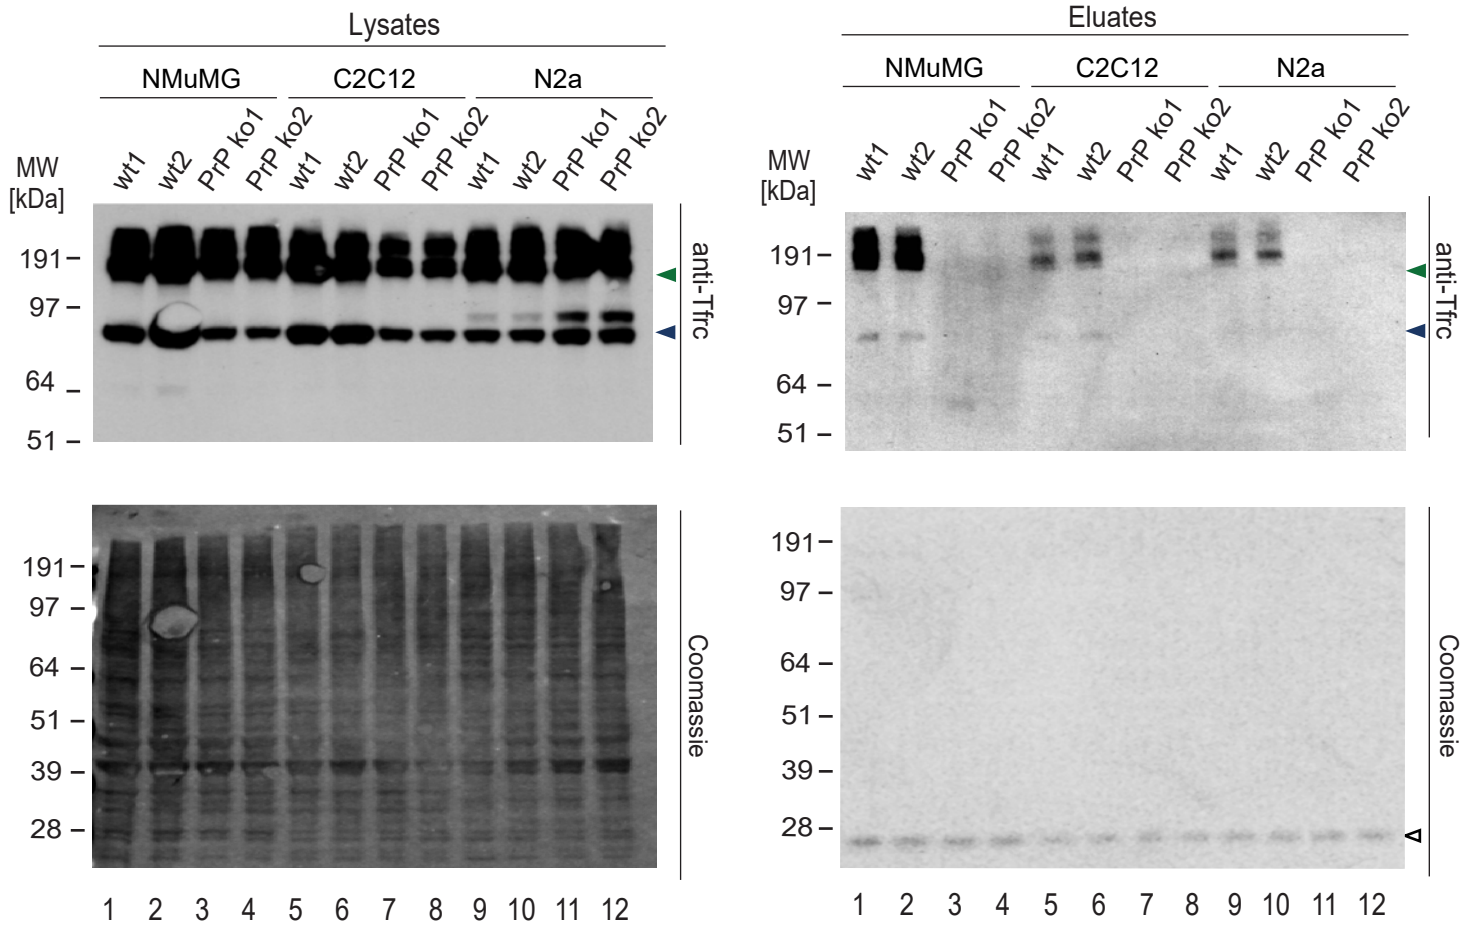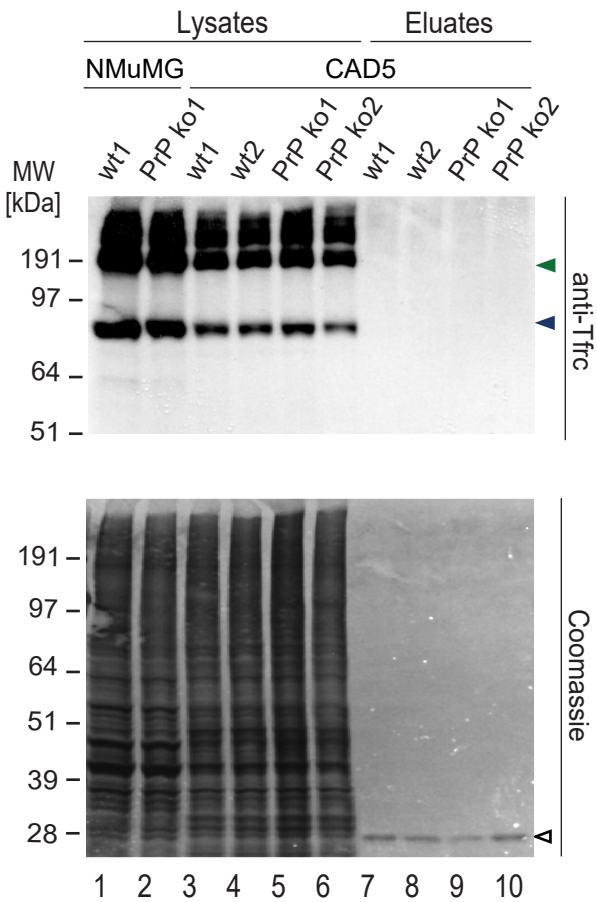

Supplementary Table S1. Comparison of the PrP interactome in four mouse cell models (only a subset of non-specific interactors shown)

| Accession     | Protein name                                          | Gene     | Coverage | Peptides | PSMs | NMuMG   |         |         |         |         | Count | Score | C2C12   |         |         |         |         | Count | Score | N2A     |         |         |         |         | Count | Score  | CAD5    |         |         |         | Count | Score |         |
|---------------|-------------------------------------------------------|----------|----------|----------|------|---------|---------|---------|---------|---------|-------|-------|---------|---------|---------|---------|---------|-------|-------|---------|---------|---------|---------|---------|-------|--------|---------|---------|---------|---------|-------|-------|---------|
|               |                                                       |          |          |          |      | wt1 ko3 | ko1 ko3 | wt2 ko3 | ko2 ko3 | wt3 ko3 |       |       | wt1 ko3 | ko1 ko3 | wt2 ko3 | ko2 ko3 | wt3 ko3 |       |       | wt1 ko3 | ko1 ko3 | wt2 ko3 | ko2 ko3 | wt3 ko3 |       |        | wt1 ko3 | ko1 ko3 | wt2 ko3 | ko2 ko3 |       |       | wt3 ko3 |
| IP100120793.1 | Major prion protein                                   | Prnp     | 62.99%   | 12       | 957  | 12.75   | 0.80    | 16.29   | 1.14    | 11.43   | 49    | 558.5 | 22.02   | 1.59    | 27.84   | 2.95    | 30.59   | 55    | 512.1 | 10.88   | 1.38    | 8.35    | 1.70    | 7.63    | 60    | 371.9  | 13.37   | 17.31   | 13.89   | 0.67    | 38    | 365.3 |         |
| IP100122971.2 | Neural cell adhesion molecule 1                       | Ncam1    | 75.52%   | 66       | 852  | 4.62    | 0.75    | 3.97    | 2.02    | 4.88    | 24    | 149.6 | 10.26   | 1.52    | 4.76    | 1.01    | 6.61    | 6     | 49.9  | 13.72   | 1.60    | 17.55   | 1.18    | 21.13   | 86    | 536.8  | 10.05   | 13.20   | 12.00   | 0.84    | 103   | 897.8 |         |
| IP100273801.3 | Zinc transporter ZIP10                                | Slc39a10 | 24.37%   | 18       | 32   |         |         |         |         |         |       |       |         |         |         |         |         |       |       |         |         |         |         |         |       | 32.77  | 44.87   | 43.18   | 0.23    | 2       | 30.9  |       |         |
| IP100930882.1 | 4F2 cell-surface antigen heavy chain                  | Slc3a2   | 61.77%   | 35       | 495  | 2.44    | 1.15    | 1.52    | 0.90    | 5.28    | 2     | 21.0  |         |         |         |         |         |       |       | 7.07    | 1.26    | 9.69    | 1.01    | 10.55   | 83    | 438.8  | 12.54   | 14.78   | 11.53   | 1.08    | 43    | 333.3 |         |
| IP100129395.2 | Large neutral amino acids transporter small subunit 1 | Slc7a5   | 36.13%   | 10       | 33   |         |         |         |         |         |       |       |         |         |         |         |         |       |       | 6.88    | 1.34    | 7.69    | 1.35    | 7.81    | 9     | 35.2   | 18.78   | 18.62   | 12.14   | 1.18    | 3     | 38.0  |         |
| IP100408495.1 | Basigin                                               | Bsg      | 56.04%   | 16       | 108  |         |         |         |         |         |       |       |         |         |         |         |         |       |       | 3.23    | 1.74    | 2.49    | 1.03    | 2.40    | 10    | 55.5   | 17.37   | 14.40   | 18.57   | 0.72    | 17    | 100.1 |         |
| IP100762815.1 | Endothelin-converting enzyme 1                        | Ece1     | 63.89%   | 53       | 532  | 9.43    | 0.67    | 9.11    | 1.43    | 8.59    | 127   | 659.9 | 5.37    | 1.21    | 6.12    | 1.12    | 6.12    | 8     | 112.8 |         |         |         |         |         |       |        |         |         |         |         |       |       |         |
| IP100947629.1 | Thrombospondin type-1 domain-containing protein 7A    | Thsd7a   | 45.57%   | 61       | 191  |         |         |         |         |         |       | 34.5  |         |         |         |         |         |       |       |         |         |         |         |         |       |        | 14.07   | 14.14   | 14.44   | 0.81    | 15    | 152.1 |         |
| IP100114022.1 | Insulin-like growth factor-binding protein 5          | Igfbp5   | 40.59%   | 10       | 33   |         |         |         |         |         |       |       | 9.67    | 2.42    | 9.37    | 3.02    | 12.96   | 5     | 18.1  |         |         |         |         |         |       |        |         |         |         |         |       |       |         |
| IP100153809.1 | CD109 antigen                                         | Cd109    | 63.87%   | 77       | 535  | 4.74    | 0.44    | 3.56    | 1.47    | 4.49    | 15    | 294.0 | 4.32    | 0.92    | 6.32    | 1.15    | 6.61    | 22    | 348.1 |         |         |         |         |         |       |        |         |         |         |         |       |       |         |
| IP100127983.1 | Transmembrane emp24 domain-containing protein 2       | Tmed2    | 40.80%   | 9        | 62   | 9.10    | 1.16    | 7.38    | 1.17    | 13.38   | 9     | 45.9  |         |         |         |         |         |       |       |         |         |         |         |         |       |        |         |         |         |         |       |       |         |
| IP100133522.2 | Protein disulfide-isomerase                           | P4hb     | 65.42%   | 38       | 745  | 1.93    | 0.78    | 2.04    | 1.32    | 2.20    | 216   | 962.0 | 3.44    | 1.40    | 2.89    | 1.25    | 3.18    | 38    | 221.8 | 1.42    | 1.00    | 1.15    | 1.02    | 1.09    | 33    | 209.5  | 1.99    | 2.30    | 2.55    | 1.08    | 13    | 69.4  |         |
| IP100929762.1 | Endoglin                                              | Eng      | 71.61%   | 29       | 94   |         |         |         |         |         |       |       |         |         |         |         |         |       |       | 5.72    | 0.90    | 7.82    | 1.31    | 9.56    | 3     | 78.2   |         |         |         |         |       |       |         |
| IP100466570.4 | Transmembrane emp24 domain-containing protein 10      | Tmed10   | 31.96%   | 6        | 23   | 6.34    | 1.09    | 6.25    | 1.03    | 9.59    | 16    | 76.1  |         |         |         |         |         |       |       |         |         |         |         |         |       |        |         |         |         |         |       |       |         |
| IP100311682.5 | Sodium/potassium-transporting ATPase subunit alpha-1  | Atp1a1   | 15.32%   | 46       | 319  |         |         |         |         |         |       | 34.0  | 1.35    | 2.57    | 0.96    | 1.27    | 0.65    | 2     | 31.6  | 2.80    | 1.25    | 2.90    | 0.68    | 2.57    | 15    | 201.7  | 3.50    | 3.29    | 3.65    | 0.97    | 20    | 274.0 |         |
| IP100132474.3 | Integrin beta-1                                       | Irgb1    | 47.74%   | 30       | 60   | 2.91    | 1.02    | 3.25    | 1.26    | 3.50    | 1     | 15.3  |         |         |         |         |         |       |       |         | 1.01    | 0.78    | 1.26    | 0.94    | 1.39  | 1      | 20.2    | 1.81    | 2.77    | 3.44    | 0.99  | 3     | 34.8    |
| IP100229517.5 | Galectin-1                                            | Lgals1   | 77.78%   | 11       | 459  | 1.38    | 0.89    | 1.20    | 1.33    | 1.83    | 126   | 493.1 | 1.67    | 1.06    | 1.57    | 1.13    | 1.46    | 58    | 271.1 | 2.04    | 1.39    | 1.40    | 0.71    | 0.90    | 31    | 93.5   | 1.97    | 2.85    | 2.71    | 0.94    | 12    |       |         |
| IP100403079.4 | Leukocyte surface antigen CD47                        | Cd47     | 40.26%   | 15       | 54   |         |         |         |         |         |       |       |         |         |         |         |         |       |       |         |         |         |         |         |       |        |         |         |         |         |       |       |         |
| IP100187289.2 | Transmembrane protein 206                             | Tmem206  | 85.14%   | 25       | 168  | 4.75    | 0.71    | 6.96    | 2.14    | 6.46    | 11    | 108.6 |         |         |         |         |         |       |       |         |         |         |         |         |       |        |         |         |         |         |       |       |         |
| IP100137336.1 | Glypican-1                                            | Gpc1     | 67.50%   | 34       | 164  |         |         |         |         |         |       |       | 4.54    | 1.20    | 5.26    | 1.12    | 6.24    | 20    | 204.9 |         |         |         |         |         |       |        |         |         |         |         |       |       |         |
| IP100123639.1 | Calreticulin                                          | Calr     | 45.91%   | 13       | 93   | 1.47    | 0.92    | 1.25    | 0.98    | 1.71    | 5     | 44.0  |         |         |         |         |         |       |       |         | 1.57    | 0.96    | 1.65    | 0.91    | 1.51  | 10     | 86.8    | 1.50    | 1.95    | 1.75    | 0.96  | 4     | 29.1    |
| IP100272690.2 | Angiotensin-converting enzyme                         | Ace      | 50.38%   | 58       | 475  |         |         |         |         |         |       |       |         |         |         |         |         |       |       |         |         |         |         |         |       |        | 4.03    | 5.43    | 4.36    | 0.77    | 56    | 576.0 |         |
| IP100473680.2 | Transmembrane emp24 domain-containing protein 9       | Tmed9    | 42.75%   | 12       | 44   | 4.02    | 0.69    | 4.01    | 1.03    | 5.26    | 8     | 60.0  |         |         |         |         |         |       |       |         |         |         |         |         |       |        |         |         |         |         |       |       |         |
| IP100515173.1 | H-2 class I histocompatibility antigen, K-K alpha     | H2-K1    | 63.61%   | 23       | 78   |         |         |         |         |         |       |       |         |         |         |         |         |       |       |         | 3.41    | 1.04    | 4.49    | 1.29    | 5.04  | 5      | 35.2    |         |         |         |       |       |         |
| IP100118413.2 | Thrombospondin-1                                      | Thbs1    | 37.92%   | 40       | 96   | 3.79    | 0.91    | 2.67    | 0.92    | 3.07    | 10    | 75.0  |         |         |         |         |         |       |       |         |         |         |         |         |       |        |         |         |         |         |       |       |         |
| IP100985828.1 | H-2 class I histocompatibility antigen, D-P alpha     | H2-D1    | 62.50%   | 29       | 140  |         |         |         |         |         |       |       |         |         |         |         |         |       |       |         |         |         |         |         |       |        |         | 2.87    | 4.21    | 2.32    | 0.96  | 3     | 53.1    |
| IP100124700.1 | Transferrin receptor protein 1                        | Tfrc     | 58.72%   | 50       | 289  | 2.09    | 0.76    | 2.02    | 1.43    | 2.06    | 31    | 186.0 |         |         |         |         |         |       |       |         |         |         |         |         |       |        |         |         |         |         |       |       |         |
| IP100972920.1 | 40S ribosomal protein S23                             | Rps23    | 55.24%   | 13       | 106  | 1.12    | 1.15    | 0.80    | 0.99    | 1.50    | 12    | 31.7  | 1.13    | 1.23    | 1.49    | 0.72    | 0.32    | 1     | 2.3   | 2.37    | 1.39    | 1.48    | 0.86    | 0.86    | 32    | 99.9   | 3.50    | 2.78    | 2.28    | 0.87    | 10    | 32.8  |         |
| IP100230660.5 | 40S ribosomal protein S15a                            | Rps15a   | 76.92%   | 9        | 89   | 1.11    | 1.87    | 0.51    | 1.24    | 2.14    | 14    | 52.7  | 0.94    | 0.93    | 0.96    | 0.87    | 0.55    | 12    | 27.5  | 1.61    | 1.62    | 0.84    | 0.74    | 0.46    | 14    | 42.5   | 2.86    | 4.19    | 2.55    | 1.00    | 3     |       |         |
| IP100125901.5 | 40S ribosomal protein S13                             | Rps13    | 83.44%   | 20       | 85   |         |         |         |         |         |       |       | 1.01    | 0.93    | 1.18    | 1.38    | 0.97    | 6     | 34.6  | 1.39    | 1.32    | 1.19    | 0.79    | 0.56    | 15    | 69.7   | 4.53    | 4.50    | 2.78    | 1.13    | 4     | 21.3  |         |
| IP100986371.1 | 60S ribosomal protein L27a                            | Rpl27a   | 63.80%   | 13       | 49   | 1.22    | 1.41    | 0.56    | 0.89    | 1.84    | 9     | 36.2  | 0.66    | 0.35    | 0.34    | 0.22    | 0.51    | 4     | 21.0  |         |         |         |         |         |       |        | 4.94    | 1.56    | 5.58    | 1.35    | 2     | 7.8   |         |
| IP100988101.1 | 40S ribosomal protein S2                              | Rps2     | 68.26%   | 31       | 260  | 1.07    | 1.44    | 0.55    | 0.87    | 1.78    | 19    | 86.3  | 1.04    | 1.01    | 0.89    | 1.13    | 0.77    | 12    | 50.4  | 1.54    | 1.33    | 1.19    | 0.75    | 0.70    | 40    | 165.6  | 3.00    | 2.09    | 1.58    | 0.78    | 10    | 52.5  |         |
| IP100553538.3 | Histone H3.1                                          | Hist1h3a | 73.53%   | 13       | 1061 | 1.17    | 1.78    | 0.30    | 0.73    | 2.51    | 79    | 388.4 | 4.74    | 1.98    | 1.45    | 1.60    | 0.55    | 27    | 337.3 | 2.83    | 1.71    | 1.43    | 0.42    | 0.34    | 152   | 795.3  | 0.65    | 1.28    | 1.21    | 1.04    | 18    | 96.9  |         |
| IP100876549.2 | Histone H2B                                           | Hist1h2b | 79.85%   | 16       | 1365 | 1.64    | 1.77    | 0.34    | 0.72    | 2.94    | 81    | 327.9 | 3.59    | 2.59    | 1.16    | 1.65    | 0.38    | 58    | 379.9 | 3.16    | 1.60    | 1.67    | 0.51    | 0.48    | 264   | 1109.7 | 0.54    | 0.93    | 1.03    | 0.70    | 22    | 108.6 |         |
| IP100785343.2 | Histone H3.3                                          | H3f3a    | 72.79%   | 12       | 1076 | 1.10    | 1.77    | 0.29    | 0.73    | 2.29    | 82    | 437.6 | 4.37    | 1.96    | 1.70    | 2.19    | 0.36    | 38    | 399.9 | 2.74    | 1.75    | 1.41    | 0.42    | 0.34    | 148   | 762.9  | 0.65    | 1.28    | 1.21    | 1.04    | 18    | 99.4  |         |
| IP100282848.1 | 20 kDa protein                                        | Hist1h3e | 69.06%   | 18       | 1489 | 1.17    | 1.83    | 0.30    | 0.73    | 2.52    | 119   | 634.5 | 3.60    | 1.92    | 1.56    | 2.04    | 0.35    | 45    | 654.8 | 2.98    | 1.73    | 1.37    | 0.42    | 0.33    | 222   | 1341.4 | 0.65    | 1.28    | 1.21    | 1.02    | 19    | 105.6 |         |
| IP100407339.7 | Histone H4                                            | Hist1h4a | 70.87%   | 15       | 1317 | 1.04    | 1.79    | 0.38    | 0.63    | 2.03    | 123   | 447.6 | 4.40    | 1.59    | 1.41    | 1.51    | 0.38    | 93    | 496.9 | 3.10    | 1.69    | 1.33    | 0.46    | 0.28    | 344   | 1379.5 | 0.62    | 1.22    | 1.10    | 0.95    | 44    | 213.8 |         |
| IP100230264.5 | Histone H2A.x                                         | H2afx    | 93.71%   | 24       | 746  | 1.10    | 1.56    | 0.33    | 0.73    | 2.20    | 48    | 157.1 | 2.54    | 1.95    | 1.76    | 2.04    | 0.55    | 35    | 216.3 | 1.97    | 1.68    | 1.05    | 0.56    | 0.29    | 183   | 757.8  | 0.71    | 1.28    | 1.20    | 1.01    | 14    | 61.1  |         |
| IP100117348.4 | Tubulin alpha-1B chain                                | Tuba1b   | 69.18%   | 30       | 720  | 1.40    | 1.06    | 1.02    | 1.23    | 1.86    | 74    | 338.0 | 1.50    | 1.52    | 1.05    | 1.29    | 1.02    | 16    | 109.6 | 1.06    | 1.26    | 0.78    | 0.86    | 0.46    | 128   | 612.6  | 1.01    | 1.25    | 1.16    | 1.04    | 80    | 367.2 |         |
| IP100110753.1 | Tubulin alpha-1A chain                                | Tuba1b   | 69.40%   | 30       | 721  | 1.38    | 1.05    | 1.02    | 1.22    | 1.83    | 68    | 319.5 | 1.31    | 1.38    | 1.13    | 1.38    | 0.89    | 22    | 140.7 | 0.97    | 1.25    | 0.73    | 0.88    | 0.44    | 120   | 588.5  | 1.05    | 1.24    | 1.14    | 1.04    | 84    | 392.4 |         |
| IP100112251.1 | Tubulin beta-3 chain                                  | Tuba1a   | 79.78%   | 33       | 636  | 1.48    | 1.09    | 0.86    | 1.19    | 1.93    | 49    | 227.9 | 0.95    | 1.14    | 0.92    | 1.03    | 0.92    | 26    | 14    |         |         |         |         |         |       |        |         |         |         |         |       |       |         |



## Supplementary Table S2. Global proteome analysis of NMuMG cells +/- TGFB1 (dataset I) in PrP-deficient and wt cells (dataset II)

|               |                                                       | Global proteome analyses / NMuMG cells |               |               |               |               |       |                |               |            |            |                |            |            | TMT Averages |                |  |       |                 |           |
|---------------|-------------------------------------------------------|----------------------------------------|---------------|---------------|---------------|---------------|-------|----------------|---------------|------------|------------|----------------|------------|------------|--------------|----------------|--|-------|-----------------|-----------|
|               |                                                       | dataset I                              |               |               |               |               |       | dataset II     |               |            |            |                |            | I          | II           |                |  |       |                 |           |
| Accession     | Modified description                                  | Coverage                               | <u>-TGFB1</u> |               | <u>+TGFB1</u> |               | Count | <u>PrP kd1</u> |               | <u>wt1</u> |            | <u>PrP kd2</u> |            | <u>wt2</u> |              | <u>PrP kd3</u> |  | Count | <u>-/+TGFB1</u> | <u>wt</u> |
|               |                                                       |                                        | <u>+TGFB1</u> | <u>+TGFB1</u> | <u>+TGFB1</u> | <u>+TGFB1</u> |       | <u>+TGFB1</u>  | <u>+TGFB1</u> | <u>wt3</u> | <u>wt3</u> | <u>wt3</u>     | <u>wt3</u> | <u>wt3</u> | <u>wt3</u>   |                |  |       |                 |           |
| IPI00230665.3 | Neural cell adhesion molecule 1 isoform 3             | 73.27%                                 | 0.367         | 0.989         | 0.353         | 0.943         | 0.378 | 28             | 0.762         | 0.986      | 0.757      | 0.944          | 0.751      | 57         | 0.366        | 0.757          |  |       |                 |           |
| IPI00132474.3 | Integrin beta-1                                       | 75.56%                                 | 0.627         | 0.963         | 0.667         | 0.958         | 0.614 | 20             | 1.022         | 0.974      | 1.004      | 1.009          | 0.993      | 27         | 0.636        | 1.006          |  |       |                 |           |
| IPI00118413.2 | Thrombospondin-1                                      | 67.55%                                 | 0.598         | 0.963         | 0.632         | 0.807         | 0.716 | 3              | 0.989         | 0.951      | 1.007      | 0.887          | 1.000      | 10         | 0.649        | 0.999          |  |       |                 |           |
| IPI00229517.5 | Galectin-1                                            | 96.30%                                 | 0.826         | 0.919         | 0.802         | 1.138         | 0.796 | 35             | 1.047         | 0.963      | 1.133      | 1.054          | 1.156      | 41         | 0.808        | 1.112          |  |       |                 |           |
| IPI00124700.1 | Transferrin receptor protein 1                        | 74.31%                                 | 0.890         | 0.949         | 0.961         | 0.972         | 0.968 | 37             | 0.956         | 1.004      | 0.962      | 0.937          | 0.895      | 36         | 0.940        | 0.938          |  |       |                 |           |
| IPI00403079.4 | Leukocyte surface antigen CD47                        | 61.06%                                 | 1.169         | 1.103         | 1.101         | 1.027         | 1.082 | 12             | 1.051         | 1.023      | 0.967      | 0.965          | 1.018      | 13         | 1.117        | 1.012          |  |       |                 |           |
| IPI00311682.5 | Sodium/potassium-transporting ATPase subunit alpha-   | 61.68%                                 | 1.314         | 1.020         | 1.358         | 1.043         | 1.350 | 89             | 0.926         | 1.025      | 0.929      | 1.014          | 0.939      | 76         | 1.341        | 0.931          |  |       |                 |           |
| IPI00930882.1 | 4F2 cell-surface antigen heavy chain isoform a        | 76.46%                                 | 1.182         | 1.044         | 1.209         | 0.956         | 1.177 | 23             | 1.027         | 1.060      | 0.968      | 1.005          | 1.063      | 22         | 1.189        | 1.019          |  |       |                 |           |
| IPI00129395.2 | Large neutral amino acids transporter small subunit 1 | 42.58%                                 | 1.514         | 1.123         | 1.438         | 1.071         | 1.425 | 11             | 1.121         | 1.101      | 1.023      | 1.200          | 1.165      | 9          | 1.459        | 1.103          |  |       |                 |           |
| IPI00133522.2 | Protein disulfide-isomerase                           | 96.86%                                 | 0.929         | 1.017         | 0.935         | 0.990         | 0.908 | 82             | 0.883         | 0.998      | 0.898      | 1.012          | 0.914      | 104        | 0.924        | 0.898          |  |       |                 |           |
| IPI00123639.1 | Calreticulin                                          | 73.32%                                 | 0.987         | 0.950         | 0.961         | 1.071         | 0.964 | 52             | 0.935         | 0.964      | 0.952      | 1.001          | 0.978      | 34         | 0.971        | 0.955          |  |       |                 |           |
| IPI00127983.1 | Transmembrane emp24 domain-containing protein 2       | 71.14%                                 | 0.890         | 0.919         | 0.867         | 0.899         | 0.904 | 13             | 0.939         | 1.055      | 0.981      | 0.910          | 1.010      | 12         | 0.887        | 0.977          |  |       |                 |           |
| IPI00473680.2 | Transmembrane emp24 domain-containing protein 9       | 83.64%                                 | 0.944         | 0.998         | 1.000         | 0.982         | 0.885 | 15             | 0.893         | 0.963      | 0.980      | 1.051          | 1.055      | 16         | 0.943        | 0.976          |  |       |                 |           |
| IPI00466570.4 | Transmembrane emp24 domain-containing protein 10      | 62.10%                                 | 0.980         | 0.998         | 0.943         | 1.009         | 0.934 | 12             | 1.004         | 0.982      | 0.893      | 0.970          | 0.985      | 25         | 0.952        | 0.961          |  |       |                 |           |

### Heat map color code

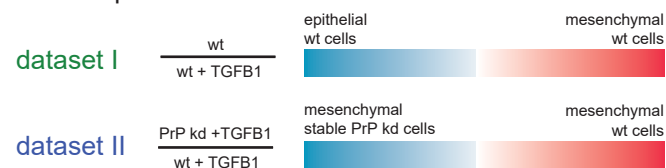

Supplement: 41598_2018_26685_MOESM1_ESM.pdf [file 41598_2018_26685_MOESM1_ESM.pdf]
